# Supplementary material
Source: PubMed Central journal article supplement (PMC4854691)
Supplement: supp_pp.15.01906_01906revSupplemental_Table_S1.pdf [file supp_pp.15.01906_01906revSupplemental_Table_S1.pdf]

Supplemental Table S1. Primers used in qRT-PCR analysis.

| AGI       | Gene           | Forward (5' to 3')       | Reverse (5' to 3')      | Reference                 |
|-----------|----------------|--------------------------|-------------------------|---------------------------|
| AT3G54320 | <i>WR11</i>    | GACCCGACACCATCTTGAAT     | GGCGGAGAGAAGCCAAATA     | This paper                |
| AT5G52920 | <i>PI-PKβ1</i> | AGTCACTATCGTCCTTCCG      | CTGTACGATTGCTATTTCCTC   | Baud,2012                 |
| AT5G16390 | <i>BCCP1</i>   | CTTCGTCGTTCTCAGTCACATC   | GCAGAGAGACGGAAAGAAACTC  | This paper                |
| AT5G15530 | <i>BCCP2</i>   | GCAGCTCGACTGTGAGATCG     | GTCTGCCATTACAGGAGGCAT   | Maeo et al,<br>2009       |
| AT5G35360 | <i>CAC2</i>    | GTCCTAGTAACCAGTCGTATTT   | TCCCATGGTCTCTACACATTTT  | This paper                |
| AT2G38040 | <i>CAC3</i>    | CGGCTCAAGAAAGGGAAGAA     | TTTGAACTCGGCCAGGTAAG    | This paper                |
| AT5G46290 | <i>KASI</i>    | GGGTCTGCTTTGTTGGCGA      | GCCTCAGTCCCACCAGCAAT    | Baud,2012                 |
| AT1G62640 | <i>KASIII</i>  | TCTGTGGCTACAAGGCTGCAT    | TGCTGATCCCCACGTTAAACCG  | Baud,2012                 |
| AT3G44830 | <i>PDAT</i>    | GATGTTGCAGTTGCCAGAGCGATT | TGAGTCCCATGTGCGTGCATTCT | This paper                |
| AT2G19450 | <i>DGAT1</i>   | GCAGTTCCTTGTCTCTCTT      | AGCCAAACCTTTCCTGTAGATAG | This paper                |
| AT3G15820 | <i>ROD1</i>    | GGTGTCCGAGGAGGAGGAT      | CGTGTACTCCACGCCCATGA    | Baud,2012                 |
|           | <i>RcFAH12</i> | AAGGGTTGGCTTGGGTAATG     | GATGAGCCATAGCGTGGAATAG  | This paper                |
| AT1G13320 | <i>PP2A</i>    | TAACGTGGCCAAAATGATGC     | GTTCTCCACAACCGCTTGGT    | Czechowski et<br>al, 2005 |
