# Supplementary material
Source: PubMed Central journal article supplement (PMC4854691)
Supplement: supp_pp.15.01906_PP2015-01906R1_Supplemental_Figure_S1.pdf [file supp_pp.15.01906_PP2015-01906R1_Supplemental_Figure_S1.pdf]

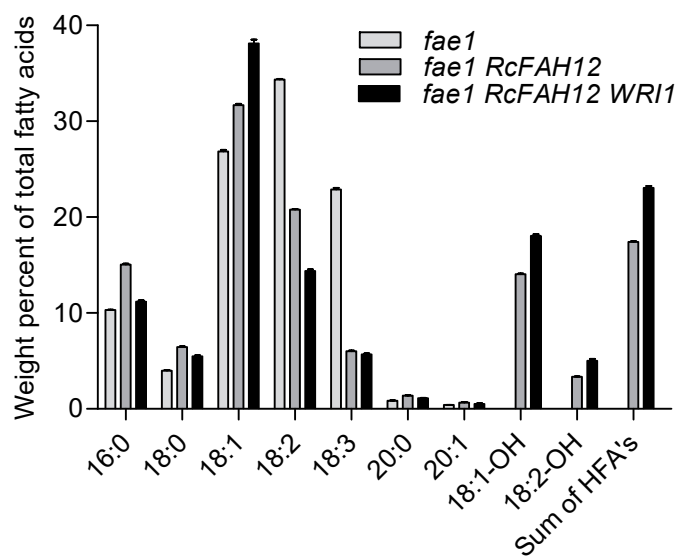

**Supplemental Figure S1.** Fatty acid composition of seeds. FA composition from *fae1*, *fae1 RcFAH12* and T<sub>4</sub> seeds of *fae1 RcFAH12 WRI1* line 13. n=11, error bars represent SE.
