# Supplementary material
Source: PubMed Central journal article supplement (PMC4854691)
Supplement: supp_pp.15.01906_PP2015-01906R1_Supplemental_Figure_S2.pdf [file supp_pp.15.01906_PP2015-01906R1_Supplemental_Figure_S2.pdf]

1 aagataatcaagaaaacaggtatagcgtttcttctacgtcagatatcaaatccgtgatcgagtgaacaatgtcaatgacaatattctacaag  
2 aagaaatgtttcattcatatttcttggaatgtatcgattgatcatttgtttctcctgttttgtttctatattgttaacactacaccaatgcttctgct  
3 gctttggatgacgagatagtttttttactcgacacatcatacaagacctcgtgaagtatctgtaatacacgaatcattaatacacaacagaata  
4 atgcattactatagttttgagaatctcattctcatactctgtctctcttgggtcgaagaatcacacttaacataaaaaagaacaacatgctcagt  
5 acacaaaggtaaagcccaccaaagagagaaaagaaaacaagacttaactataacaataaatttaatgctcgtctcaaaactcatttttcatat  
6 gaatttttaacacaaacaattttcCTGGaaatctcCCGccttgatctcttataactcatctctatactccgaacatgcccctcctcgta  
7 accttaacggccATG

8  
9 **Supplemental Figure S2.** Location of the AW-box in *ROD1* proximal upstream region.  
10 ATG, transcription start site; red, 5'-UTR; black, promoter. The AW-box motifs are highlighted  
11 in blue.
