# Supplementary material
Source: PubMed Central journal article supplement (PMC4854691)
Supplement: supp_pp.15.01906_PP2015-01906R1_Supplemental_Figure_S3.pdf [file supp_pp.15.01906_PP2015-01906R1_Supplemental_Figure_S3.pdf]

|    |             |   |                            |   |  |
|----|-------------|---|----------------------------|---|--|
| 1  | AW-box      |   |                            |   |  |
| 2  | ROD1/PDCT   | + | <b>TCCTTGGAAATCTCCGCC</b>  | * |  |
| 3  | PHASEOLIN   | + | <b>TGCATGGATGCTTGCGCA</b>  | * |  |
| 4  | PHASEOLIN   | - | <b>GGCATGGGATGACACGCA</b>  | * |  |
| 5  | PI-PKB1     | + | <b>GCCTTCGTAAGTTCCGCC</b>  |   |  |
| 6  | PI-PKB1     | - | <b>TGCTTAGTTTCGTATCGAA</b> |   |  |
| 7  | BCCP1       | + | <b>CTCTTTGGTTTCATCGAG</b>  | * |  |
| 8  | BCCP2       | + | <b>TTCTTCGGTTTCATCGTC</b>  |   |  |
| 9  | BCCP2       | - | <b>TTCTTCGTAAGCATCGAA</b>  |   |  |
| 10 | CAC2        | + | <b>AACCTCGTGATTATCGAA</b>  | * |  |
| 11 | CAC2        | - | <b>ATCCTCGTGAGTATCGAA</b>  | * |  |
| 12 | KASI        | + | <b>AACATCGTACTTATCGCC</b>  |   |  |
| 13 | KASI        | - | <b>TTCTTCGAATAATTGCT</b>   |   |  |
| 14 | KASIII      | + | <b>CGCTTCGGTACTTCCGAA</b>  | * |  |
| 15 | PTLPD2      | - | <b>TCCTTCGTTAAAGCCGCC</b>  |   |  |
| 16 | PDHE1-ALPHA | - | <b>TCCTTGGCTGATCCCGAT</b>  |   |  |
| 17 | PDHE1-BETA  | - | <b>TTCTTCGATTTCTCCGCT</b>  |   |  |
| 18 | PDHE1-BETA  | - | <b>AACGTCGATAACGTCGTC</b>  |   |  |
| 19 | ACBP6       | + | <b>GTCCTCGTCTTCTCCGTC</b>  | * |  |
| 20 | ACP1        | - | <b>CTCTTTGTACACTCCGCC</b>  |   |  |
| 21 | PTLPD1      | - | <b>TGCTTTGAACAGTTCGTC</b>  |   |  |
| 22 | ENR1        | + | <b>AGCTTCGATGAGATCGAG</b>  |   |  |
| 23 | FATA        | - | <b>GTCGTTGACAAATACGAA</b>  |   |  |
| 24 | FATA        | - | <b>GTCCTCGGTCTCATCGTC</b>  |   |  |
| 25 | AT2G30200   | - | <b>ATCTTCGTTAACTCCGCT</b>  |   |  |
| 26 | At2g22230   | - | <b>ACCTTTGTACTCTCCGCT</b>  |   |  |
| 27 | AT5G10160   | + | <b>CCCTTCGAATTCTCCGTC</b>  |   |  |
| 28 | AT3G02630   | + | <b>AGCATAGAAATAATCGAA</b>  |   |  |
| 29 | AT3G02630   | - | <b>GTCATCGCGACCGTCGTG</b>  |   |  |
| 30 | AT5G16240   | - | <b>GACTTGGAGAAATTGCTG</b>  |   |  |
| 31 | AT1G24360   | - | <b>AACCTTCGTTTGTATCGCG</b> |   |  |
| 32 | AT1G24360   | + | <b>AACCTCGTAAAGATCGAC</b>  |   |  |
| 33 |             |   |                            |   |  |

34 **Supplemental Figure S3.** AW-boxes in WRI1 targets involved in lipid metabolism. Adapted  
35 from Maeo et al. (2009) and appended with AW-box information from *ROD1* and other genes as  
36 relevant to this paper. +, forward DNA strand; -, complementary sequence from reverse DNA  
37 strand; \*, not reported before.
